# Supplementary material for: Core–shell structured nanocomposites Ag@CeO2 as catalysts for hydrogenation of 4-nitrophenol and 2-nitroaniline
Source: Royal Society of Chemistry journal article supplement (doi:10.1039/c6ra00631k), 2016-01-01
Supplement: c6ra00631k1.pdf [file c6ra00631k1.pdf]

## Supplementary data

### **Core-shell structured nanocomposites Ag@CeO<sub>2</sub> as catalyst for hydrogenation of 4-nitrophenol and 2-nitroaniline**

Yao Shi, Xiaoliang Zhang, Hongliang Tan, Xiangshu Chen, Zhang-Hui Lu\*

*Jiangxi Inorganic Membrane Materials Engineering Research Centre, College of Chemistry and Chemical Engineering, Jiangxi Normal University, Nanchang, 330022, China*

\*Corresponding author. E-mail: luzh@jxnu.edu.cn (Z.-H. Lu)

### ***1.1. Synthesis of commercial CeO<sub>2</sub> supported Ag NPs***

0.1 g of commercial CeO<sub>2</sub> and 10 mL of 0.005 mM AgNO<sub>3</sub> aqueous solution were mixed together. After stirring at room temperature for 2 h, 10 mg of NaBH<sub>4</sub> was added into this aqueous solution. The product was purified by centrifugation and dried at 313 K in vacuum overnight.

### ***1.2. Synthesis of free Ag NPs***

With constant vigorous stirring, a certain amount NaBH<sub>4</sub> was added to AgNO<sub>3</sub> aqueous solution (10 mL, 0.15 M). The obtained product was further washed with anhydrous ethanol and water three times. It was obtained by drying in vacuum oven at 313 K overnight.

**Under N<sub>2</sub> atmosphere, redox reaction occurs between [Ag(NH<sub>3</sub>)<sub>2</sub>]OH and Ce(NO<sub>3</sub>)<sub>3</sub> in an alkaline condition.**

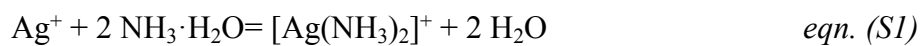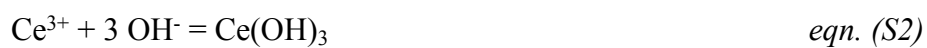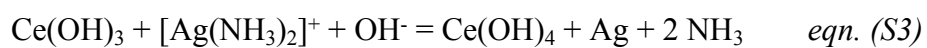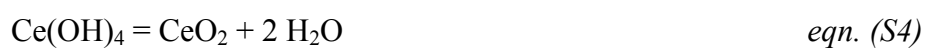

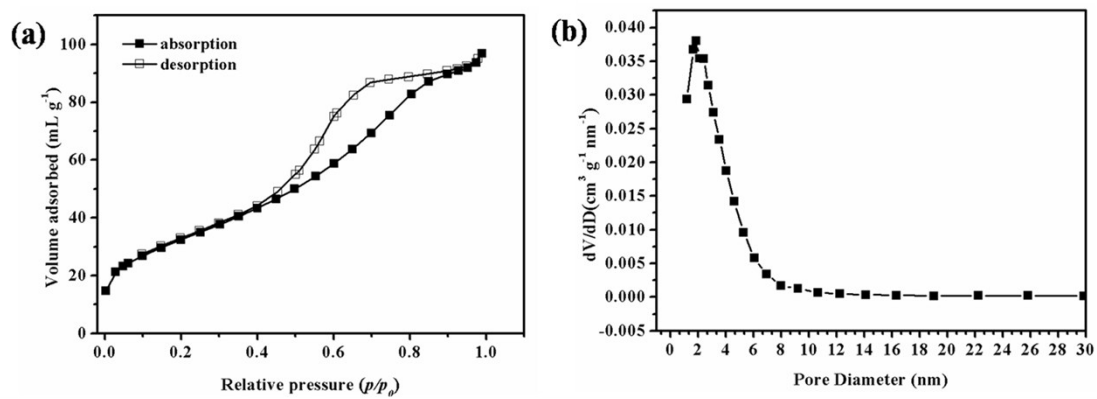

**Fig. S1.** Nitrogen adsorption-desorption isotherms (a) and the pore size distribution (b) of the Ag@CeO<sub>2</sub> NCs.

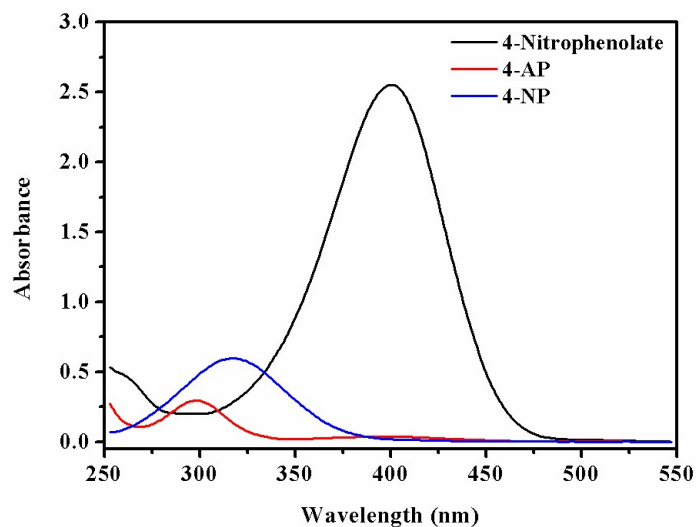

**Fig. S2.** UV-vis absorption spectra of 4-Nitrophenolate ion (black line), 4-AP (red line), and 4-NP (blue line).

Initially, the 4-NP solution, which have a light yellow color, rapidly turned bright yellow upon the addition of  $\text{NaBH}_4$  solution because of the formation of 4-nitrophenolate ions in the alkaline conditions.<sup>25-28</sup> The corresponding absorption peak shifted from 317 nm (assigned to 4-NP) to 400 nm (assigned to 4-nitrophenolate ion), and the absorption peak at 298 nm is 4-AP which is colourless after the complete reduction.

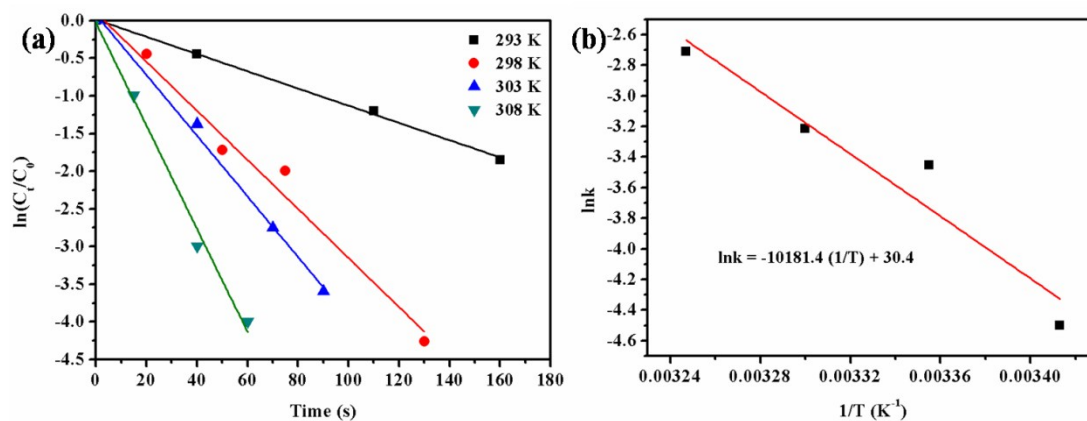

**Fig. S3.** Plots of  $\ln(C_t/C_0)$  versus time for the catalytic reduction of 4-NP with  $\text{NaBH}_4$  by  $\text{Ag}@CeO_2$  NCs at different temperatures (a) and the corresponding Arrhenius plot (b) ( $\text{Ag}/4\text{-NP} = 0.20$ ,  $\text{NaBH}_4/4\text{-NP} = 154$ ).

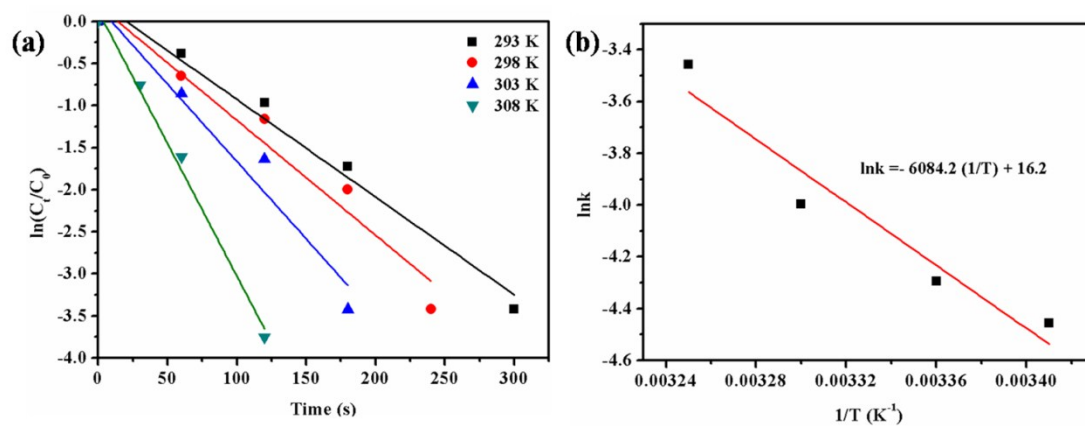

**Fig. S4.** Plots of  $\ln(C_t/C_0)$  versus time for the catalytic reduction of 2-NA with  $\text{NaBH}_4$  by  $\text{Ag@CeO}_2$  NCs at different temperatures (a) and the corresponding Arrhenius plot (b) ( $\text{Ag}/2\text{-NA} = 0.14$ ,  $\text{NaBH}_4/2\text{-NA} = 316$ ).

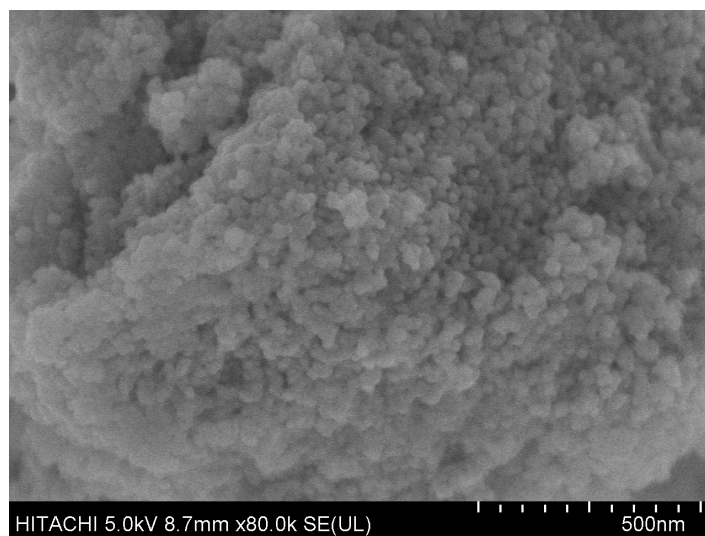

**Fig. S5.** SEM image of the Ag@CeO<sub>2</sub> NCs after tenth runs for the catalytic reduction of 4-NP.
